# Supplementary material for: Mucosal adenovirus vaccine boosting elicits IgA and durably prevents XBB.1.16 infection in nonhuman primates
Source: PubMed Central journal article supplement (PMC11436372; doi:10.1038/s41590-024-01951-5), 2024-09-03
Supplement: 41590_2024_1951_MOESM1_ESM.pdf [file 41590_2024_1951_MOESM1_ESM.pdf]

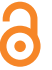

# **Mucosal adenovirus vaccine boosting elicits IgA and durably prevents XBB.1.16 infection in nonhuman primates**

In the format provided by the authors and unedited

# Supplementary Data Table of Contents

## Supplementary Tables

|                                                                                                               |   |
|---------------------------------------------------------------------------------------------------------------|---|
| Table 1. Relative increase in serum titers to XBB.1.16 following challenge .....                              | 2 |
| Table 2. AE immunization preferentially expands antigen-specific memory B cell compartment in the lungs ..... | 3 |
| Table 3. Durable boost in mucosal antibodies following mucosal vaccination .....                              | 4 |
| Table 4. IgG and IgA contribute to protective airway responses in mucosally vaccinated NHP .....              | 7 |
| Table 5. AE immunization preferentially expands antigen-specific memory T cell compartment in the lungs ..... | 9 |

## Supplementary Figures

|                                                                                                    |    |
|----------------------------------------------------------------------------------------------------|----|
| Figure 1. Non-specific T cell recruitment into the lungs following IM, IN or AE immunization ..... | 11 |
|----------------------------------------------------------------------------------------------------|----|

| <b>Group</b>                           | <b>Fold-increase of serum anti-XBB.1.16 IgG binding titers</b> |
|----------------------------------------|----------------------------------------------------------------|
| mRNA-1273 (IM) x2 + mRNA-1273.222 (IM) | 2.06                                                           |
| mRNA-1273 (IM) x2 + Bivalent ChAd (IN) | 2.51                                                           |
| mRNA-1273 (IM) x2 + Bivalent ChAd (AE) | 0.67                                                           |
| Bivalent ChAd (AE) x 1                 | 4.03                                                           |

1 **Supplementary Table 1. Relative increase in serum titers to XBB.1.16 following challenge**

2 Sera were collected pre- (week 48) and post- (day 15) XBB.1.16 challenge. Fold-increase in anti-

3 XBB.1.16 IgG GMT in AU / mL described. AU below a value of 1 were replaced with a value of

4 1 prior to calculation. Related to **Fig. 2g**.

**a**

| <b>S-specific memory B cell frequency</b><br>Week 8 (post-dose 2) vs. Week 36 (post-boost) |            |                    |             |                    |
|--------------------------------------------------------------------------------------------|------------|--------------------|-------------|--------------------|
| <i>Group</i>                                                                               | <b>BAL</b> |                    | <b>PBMC</b> |                    |
|                                                                                            | <i>p</i>   | <i>Fold-change</i> | <i>p</i>    | <i>Fold-change</i> |
| IM boost                                                                                   | >0.05      | 1.07               | 0.0078      | 1.72               |
| IN boost                                                                                   | >0.05      | 2.05               | 0.0313      | 0.45               |
| AE boost                                                                                   | 0.0313     | 19.99              | >0.05       | 0.68               |

**b**

| <b>S-specific memory B cell frequency</b><br>Week 36 (post-boost) for indicated group in comparison to IM boost group |            |                    |             |                    |
|-----------------------------------------------------------------------------------------------------------------------|------------|--------------------|-------------|--------------------|
| <i>Group</i>                                                                                                          | <b>BAL</b> |                    | <b>PBMC</b> |                    |
|                                                                                                                       | <i>p</i>   | <i>Fold-change</i> | <i>p</i>    | <i>Fold-change</i> |
| IM boost                                                                                                              | -          | -                  | -           | -                  |
| IN boost                                                                                                              | >0.05      | 0.76               | 0.0007      | 0.22               |
| AE boost                                                                                                              | 0.0007     | 20.37              | 0.0007      | 0.25               |
| AE prime                                                                                                              | 0.0040     | 13.31              | 0.0040      | 0.28               |

5 **Supplementary Table 2. AE immunization preferentially expands antigen-specific memory**

6 **B cell compartment in the lungs**

7 (a) Two-sided Wilcoxon signed-rank tests conducted for S-specific memory B cell frequencies at  
8 week 36 (post-boost) compared to week 8 (post-dose 2) per group, and (b) two-sided Wilcoxon  
9 rank-sum tests conducted for each indicated vaccinated cohort in comparison to IM boosted  
10 benchmark at week 36 (post-boost). *p* values and fold-changes in geometric mean frequency  
11 indicated. S-specific frequencies of 0% were set to half the minimum of the non-zero data prior  
12 to calculation of fold-change. Statistically significant increased B cell frequencies are indicated  
13 in red while significant decreases are indicated in orange. Related to **Fig. 3**.

**a**

| <b>BAL IgG</b> |                          |          |             |          |             |          |             |          |             |
|----------------|--------------------------|----------|-------------|----------|-------------|----------|-------------|----------|-------------|
| Group          |                          | IM boost |             | IN boost |             | AE boost |             | AE prime |             |
| Comparison     |                          | p value  | Fold-change | p value  | Fold-change | p value  | Fold-change | p value  | Fold-change |
| WA1            | Post-boost Wk 34 vs 28   | 0.0078   | 376.00      | 0.0313   | 89.51       | 0.0313   | 361.12      | -        | -           |
|                | Prechallenge Wk 48 vs 34 | 0.0078   | 0.20        | >0.05    | 0.66        | >0.05    | 0.70        | >0.05    | 7.45        |
| BA.5           | Post-boost Wk 34 vs 28   | 0.0078   | 124.55      | 0.0313   | 25.45       | 0.0313   | 103.60      | -        | -           |
|                | Prechallenge Wk 48 vs 34 | 0.0078   | 0.23        | >0.05    | 0.57        | >0.05    | 0.73        | >0.05    | 24.85       |
| XBB.1.16       | Post-boost Wk 34 vs 28   | 0.0078   | 88.25       | 0.0313   | 19.45       | 0.0313   | 87.08       | -        | -           |
|                | Prechallenge Wk 48 vs 34 | 0.0078   | 0.22        | >0.05    | 0.56        | >0.05    | 0.65        | >0.05    | 19.77       |

**b**

| <b>BAL IgA</b> |                          |          |             |          |             |          |             |          |             |
|----------------|--------------------------|----------|-------------|----------|-------------|----------|-------------|----------|-------------|
| Group          |                          | IM boost |             | IN boost |             | AE boost |             | AE prime |             |
| Comparison     |                          | p value  | Fold-change | p value  | Fold-change | p value  | Fold-change | p value  | Fold-change |
| WA1            | Post-boost Wk 34 vs 28   | >0.05    | 2.64        | 0.0313   | 28.83       | 0.0313   | 1323.51     | -        | -           |
|                | Prechallenge Wk 48 vs 34 | >0.05    | 0.58        | >0.05    | 0.96        | >0.05    | 1.04        | >0.05    | 2.23        |
| BA.5           | Post-boost Wk 34 vs 28   | 0.0078   | 1.89        | 0.0313   | 13.00       | 0.0313   | 537.50      | -        | -           |
|                | Prechallenge Wk 48 vs 34 | >0.05    | 0.67        | >0.05    | 0.75        | >0.05    | 1.44        | >0.05    | 10.80       |
| XBB.1.16       | Post-boost Wk 34 vs 28   | >0.05    | 1.00        | 0.0313   | 7.50        | 0.0313   | 346.74      | -        | -           |
|                | Prechallenge Wk 48 vs 34 | >0.05    | 1.06        | >0.05    | 0.89        | >0.05    | 1.53        | >0.05    | 12.62       |

**c**

| NW IgG     |                          |          |             |          |             |          |             |          |             |
|------------|--------------------------|----------|-------------|----------|-------------|----------|-------------|----------|-------------|
| Group      |                          | IM boost |             | IN boost |             | AE boost |             | AE prime |             |
| Comparison |                          | p value  | Fold-change | p value  | Fold-change | p value  | Fold-change | p value  | Fold-change |
| WA1        | Post-boost Wk 34 vs 28   | 0.0391   | 6.96        | >0.05    | 1.90        | >0.05    | 1.10        | -        | -           |
|            | Prechallenge Wk 48 vs 34 | >0.05    | 0.51        | >0.05    | 2.21        | >0.05    | 3.11        | >0.05    | 14.26       |
| BA.5       | Post-boost Wk 34 vs 28   | 0.0156   | 9.24        | >0.05    | 1.99        | >0.05    | 1.20        | -        | -           |
|            | Prechallenge Wk 48 vs 34 | >0.05    | 0.44        | >0.05    | 2.03        | >0.05    | 2.91        | >0.05    | 87.22       |
| XBB.1.16   | Post-boost Wk 34 vs 28   | 0.0391   | 4.58        | >0.05    | 1.89        | >0.05    | 1.12        | -        | -           |
|            | Prechallenge Wk 48 vs 34 | >0.05    | 0.38        | >0.05    | 1.95        | >0.05    | 2.45        | >0.05    | 24.94       |

**d**

| NW IgA     |                          |          |             |          |             |          |             |          |             |
|------------|--------------------------|----------|-------------|----------|-------------|----------|-------------|----------|-------------|
| Group      |                          | IM boost |             | IN boost |             | AE boost |             | AE prime |             |
| Comparison |                          | p value  | Fold-change | p value  | Fold-change | p value  | Fold-change | p value  | Fold-change |
| WA1        | Post-boost Wk 34 vs 28   | >0.05    | 2.26        | >0.05    | 12.63       | >0.05    | 4.24        | -        | -           |
|            | Prechallenge Wk 48 vs 34 | >0.05    | 0.37        | 0.0313   | 4.09        | >0.05    | 1.34        | >0.05    | 4.29        |
| BA.5       | Post-boost Wk 34 vs 28   | >0.05    | 2.02        | >0.05    | 10.97       | >0.05    | 3.85        | -        | -           |
|            | Prechallenge Wk 48 vs 34 | 0.0078   | 0.25        | 0.0313   | 4.15        | >0.05    | 1.51        | >0.05    | 13.78       |
| XBB.1.16   | Post-boost Wk 34 vs 28   | >0.05    | 1.87        | >0.05    | 9.41        | >0.05    | 2.99        | -        | -           |
|            | Prechallenge Wk 48 vs 34 | 0.0781   | 0.27        | 0.0313   | 4.27        | >0.05    | 1.36        | >0.05    | 2.48        |

14 **Supplementary Table 3. Durable boost in mucosal antibodies following mucosal vaccination**  
 15 BAL (a-b) and NW (c-d) were collected pre-boost (week 28), post-boost (week 34) and pre-  
 16 challenge (week 48). IgG (a, c) and IgA (b, d) binding titers in AU / mL measured to WA1, BA.5  
 17 or XBB.1.16 S as indicated. AU below a value of 1 were replaced with a value of 1 before

18 calculation of fold-change in anti-S antibody GMT. AE prime cohort received no vaccine prior to  
19 the initial regimen at week 32 and thus responses were not measured at week 28. Note that pre-  
20 boost data is derived per individual group and is used for determination of fold-changes whereas  
21 fold-changes in the text reflect the combined values across all mRNA-primed cohorts prior to  
22 boost. Comparisons between timepoints were done using two-sided Wilcoxon signed-rank tests.  
23 Statistically significant increases in antibody titers are indicated in red while significant  
24 contractions are indicated in orange. Related to **Fig. 4**.

**a**

| <b>BAL ACE2 – variant S binding inhibition</b> |                          |          |             |          |             |          |             |          |             |
|------------------------------------------------|--------------------------|----------|-------------|----------|-------------|----------|-------------|----------|-------------|
| Group                                          |                          | IM boost |             | IN boost |             | AE boost |             | AE prime |             |
| Comparison                                     |                          | p value  | Fold-change | p value  | Fold-change | p value  | Fold-change | p value  | Fold-change |
| WA1                                            | Post-boost Wk 34 vs 28   | 0.0078   | 8.53        | >0.05    | 1.71        | 0.0313   | 13.93       | -        | -           |
|                                                | Prechallenge Wk 48 vs 34 | 0.0078   | 0.30        | >0.05    | 0.42        | >0.05    | 0.94        | >0.05    | 0.56        |
| BA.5                                           | Post-boost Wk 34 vs 28   | >0.05    | 3.54        | N.D.     | 1.00        | >0.05    | 32.80       | -        | -           |
|                                                | Prechallenge Wk 48 vs 34 | >0.05    | 0.28        | N.D.     | 1.00        | >0.05    | 0.89        | >0.05    | 5.63        |
| XBB.1.16                                       | Post-boost Wk 34 vs 28   | >0.05    | 0.70        | 0.0313   | 5.07        | >0.05    | 2.35        | -        | -           |
|                                                | Prechallenge Wk 48 vs 34 | >0.05    | 0.13        | 0.0313   | 2.37        | >0.05    | 0.98        | >0.05    | 0.62        |

**b**

| <b>NW ACE2 – variant S binding inhibition</b> |                          |          |             |          |             |          |             |          |             |
|-----------------------------------------------|--------------------------|----------|-------------|----------|-------------|----------|-------------|----------|-------------|
| Group                                         |                          | IM boost |             | IN boost |             | AE boost |             | AE prime |             |
| Comparison                                    |                          | p value  | Fold-change | p value  | Fold-change | p value  | Fold-change | p value  | Fold-change |
| WA1                                           | Post-boost Wk 34 vs 28   | >0.05    | 1.25        | >0.05    | 0.65        | >0.05    | 0.65        | -        | -           |
|                                               | Prechallenge Wk 48 vs 34 | >0.05    | 0.85        | 0.0313   | 3.40        | >0.05    | 2.18        | >0.05    | 0.24        |

**c**

| <b>BAL immunoglobulin class depletion</b> |          |          |             |          |             |          |             |          |             |
|-------------------------------------------|----------|----------|-------------|----------|-------------|----------|-------------|----------|-------------|
| Group                                     |          | IM boost |             | IN boost |             | AE boost |             | AE prime |             |
| Comparison                                |          | p value  | Fold-change | p value  | Fold-change | p value  | Fold-change | p value  | Fold-change |
| IgG Depletion                             | WA1      | 0.0078   | 0.11        | >0.05    | 0.93        | >0.05    | 0.37        | >0.05    | 1.16        |
|                                           | BA.5     | >0.05    | 0.54        | >0.05    | 0.84        | >0.05    | 0.49        | >0.05    | 0.62        |
|                                           | XBB.1.16 | 0.0078   | 0.21        | N.D.     | 1.00        | 0.0313   | 0.21        | >0.05    | 0.86        |
| IgA Depletion                             | WA1      | >0.05    | 1.48        | >0.05    | 1.85        | >0.05    | 0.87        | >0.05    | 0.57        |
|                                           | BA.5     | >0.05    | 1.68        | >0.05    | 0.88        | >0.05    | 0.56        | >0.05    | 1.19        |
|                                           | XBB.1.16 | 0.0391   | 0.57        | N.D.     | 1.00        | 0.0313   | 0.37        | >0.05    | 0.90        |



**d**

| <b>NW immunoglobulin class depletion</b> |     |          |             |          |             |          |             |          |             |
|------------------------------------------|-----|----------|-------------|----------|-------------|----------|-------------|----------|-------------|
| Group                                    |     | IM boost |             | IN boost |             | AE boost |             | AE prime |             |
| Comparison                               |     | p value  | Fold-change | p value  | Fold-change | p value  | Fold-change | p value  | Fold-change |
| IgG Depletion                            | WA1 | 0.0156   | 0.32        | >0.05    | 0.93        | 0.0313   | 0.62        | >0.05    | 1.24        |
| IgA Depletion                            | WA1 | >0.05    | 0.74        | 0.0313   | 0.13        | >0.05    | 0.55        | >0.05    | 0.69        |

25 **Supplementary Table 4. IgG and IgA contribute to protective airway responses in mucosally**  
26 **vaccinated NHP**

27 BAL (**a, c**) and NW (**b, d**) were collected pre-boost (week 28), post-boost (week 34) and pre-  
28 challenge (week 48) for longitudinal analysis in **a-b** and at a single late memory timepoint (week  
29 44) for immunoglobulin class depletion in **c-d**. WA1, BA.5 and XBB.1.16 S binding to ACE2 was  
30 measured with and without the addition of mucosal fluids to determine percentage inhibition as a  
31 surrogate for neutralizing antibodies. (**a-b**) Fold-changes in median binding inhibition shown. Note  
32 that pre-boost data is derived per individual group and is used for determination of fold-changes  
33 whereas fold-changes in the text reflect the combined values across all mRNA-primed cohorts  
34 prior to boost. (**c-d**) Fold-changes in median binding inhibition shown for complete fluid and  
35 depleted fluid. Any group with median inhibition below 1% was given a value of 1% before  
36 calculation of fold-change. AE prime cohort received no vaccine prior to the initial regimen at  
37 week 32 and thus fold-changes between pre- and post-boost timepoints are not reported. N.D. or  
38 “Not Determined” refers to samples for which there were insufficient differences (less than 3  
39 unique values) between timepoints. Comparisons between timepoints were done using two-sided  
40 Wilcoxon signed-rank tests. Statistically significant increases in inhibitory responses are indicated  
41 in red while significant reductions are indicated in orange. Related to **Fig. 5**.

**a**

| <b>S-specific T<sub>H1</sub> frequency</b> |                 |                 |                 |                 |                 |                 |                 |                 |
|--------------------------------------------|-----------------|-----------------|-----------------|-----------------|-----------------|-----------------|-----------------|-----------------|
| Tissue                                     | <b>PBMC</b>     |                 |                 |                 | <b>BAL</b>      |                 |                 |                 |
| Group                                      | <b>IM boost</b> | <b>IN boost</b> | <b>AE boost</b> | <b>AE prime</b> | <b>IM boost</b> | <b>IN boost</b> | <b>AE boost</b> | <b>AE prime</b> |
| Comparison                                 | Fold-change     |                 |                 |                 | Fold-change     |                 |                 |                 |
| Post-boost Wk 34 vs 6                      | 0.96            | 0.74            | 1.09            | -               | 0.56            | 1.59            | 12.81           | -               |
| Pre-challenge Wk 48 vs 34                  | 0.89            | 1.00            | 1.19            | 1.00            | 1.21            | 0.74            | 1.97            | 1.06            |
| Post-challenge Day 4 vs Wk 48              | 0.95            | 1.00            | 0.92            | N.D.            | 1.07            | 1.30            | 0.65            | 0.36            |
| Post-challenge Day 15 vs Wk 48             | 1.24            | 1.06            | 0.85            | 1.66            | 1.73            | 5.66            | 0.90            | 1.58            |

**b**

| <b>S-specific CD8<sup>+</sup> T cell frequency</b> |                 |                 |                 |                 |                 |                 |                 |                 |
|----------------------------------------------------|-----------------|-----------------|-----------------|-----------------|-----------------|-----------------|-----------------|-----------------|
| Tissue                                             | <b>PBMC</b>     |                 |                 |                 | <b>BAL</b>      |                 |                 |                 |
| Group                                              | <b>IM boost</b> | <b>IN boost</b> | <b>AE boost</b> | <b>AE prime</b> | <b>IM boost</b> | <b>IN boost</b> | <b>AE boost</b> | <b>AE prime</b> |
| Comparison                                         | Fold-change     |                 |                 |                 | Fold-change     |                 |                 |                 |
| Post-boost Wk 34 vs 6                              | 0.83            | 1.00            | 1.13            | -               | 0.95            | 1.11            | 7.75            | -               |
| Pre-challenge Wk 48 vs 34                          | 0.93            | 1.00            | 1.53            | 1.40            | 0.63            | 0.96            | 9.27            | 2.03            |
| Post-challenge Day 4 vs Wk 48                      | 1.48            | 1.00            | 0.75            | N.D.            | 1.18            | 1.11            | 0.70            | 0.40            |
| Post-challenge Day 15 vs Wk 48                     | 1.41            | 1.02            | 0.76            | 0.86            | 2.53            | 4.44            | 0.73            | 0.54            |

**c**

| <b>S-specific T<sub>H2</sub> and T<sub>FH</sub> frequencies</b> |                              |                 |                 |                 |                              |                 |                 |                 |
|-----------------------------------------------------------------|------------------------------|-----------------|-----------------|-----------------|------------------------------|-----------------|-----------------|-----------------|
| Tissue                                                          | <b>PBMC – T<sub>H2</sub></b> |                 |                 |                 | <b>PBMC - T<sub>FH</sub></b> |                 |                 |                 |
| Group                                                           | <b>IM boost</b>              | <b>IN boost</b> | <b>AE boost</b> | <b>AE prime</b> | <b>IM boost</b>              | <b>IN boost</b> | <b>AE boost</b> | <b>AE prime</b> |
| Comparison                                                      | Fold-change                  |                 |                 |                 | Fold-change                  |                 |                 |                 |
| Post-boost Wk 34 vs 6                                           | 1.00                         | 1.00            | 1.00            | -               | 0.72                         | 0.40            | 1.43            | -               |
| Pre-challenge Wk 48 vs 34                                       | 1.00                         | 1.00            | 1.00            | 1.00            | 0.46                         | 0.63            | 0.85            | 0.60            |

|                                   |      |      |      |      |      |      |      |      |
|-----------------------------------|------|------|------|------|------|------|------|------|
| Post-challenge<br>Day 4 vs Wk 48  | 1.00 | 1.00 | 1.00 | N.D. | 0.62 | 0.69 | 0.46 | N.D. |
| Post-challenge<br>Day 15 vs Wk 48 | 1.00 | 1.00 | 1.00 | 1.00 | 1.83 | 2.32 | 0.57 | 1.04 |

42 **Supplementary Table 5. AE immunization preferentially expands antigen-specific memory**

43 **T cell compartment in the lungs**

44 PBMC and BAL fluid were collected at weeks 6 (post-prime), 34 (post-boost) and 48 (pre-  
45 challenge) as well as on days 4 and 15 post-challenge. Lymphocytes were stimulated with  
46 SARS-CoV-2 S1 and S2 peptide pools (WA1) and then measured by intracellular staining. (a, c)  
47 Fold-changes for indicated timepoints in percentage of memory CD4<sup>+</sup> T cells with (a) T<sub>H</sub>1  
48 markers (IL-2, TNF or IFN $\gamma$ ), (c) T<sub>H</sub>2 markers (IL-4 or IL-13) or T<sub>FH</sub> cells expressing CD40L  
49 following stimulation. (b) Fold-changes for indicated timepoints in percentage of memory CD8<sup>+</sup>  
50 T cells expressing IL-2, TNF or IFN $\gamma$  following stimulation. Frequencies below 0.1% were set to  
51 0.1% prior to calculation of fold-change in geometric mean S-specific frequency. AE prime  
52 cohort received no vaccine prior to the initial regimen at week 32 and thus fold-changes between  
53 pre- and post-boost timepoints are not reported. N.D. or “Not Determined” refers to comparisons  
54 in which there were less than 2 samples contributing to calculation of group frequency for one of  
55 the timepoints. Related to **Fig. 6**.

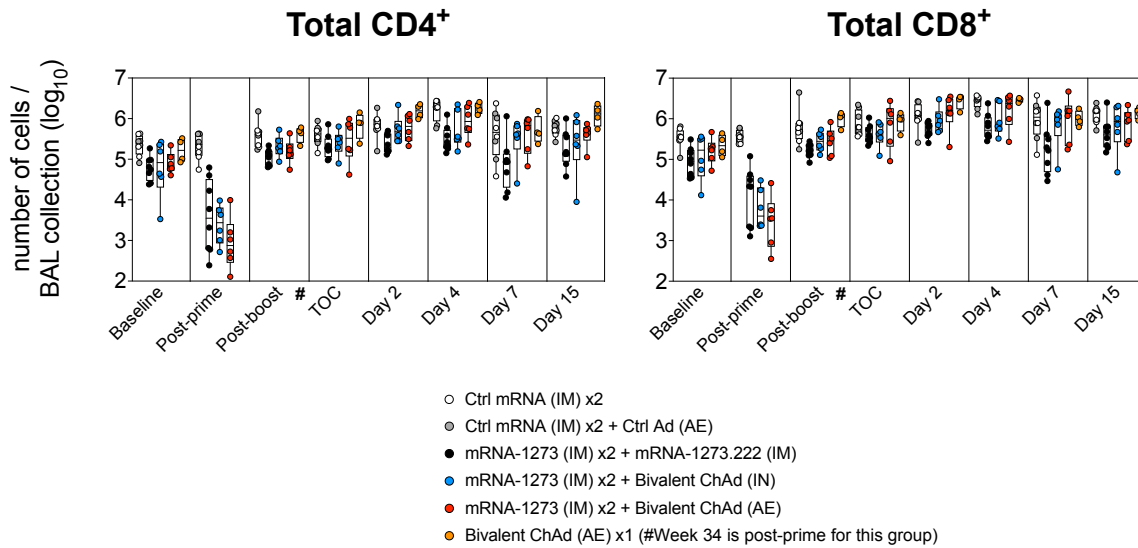

56 **Supplementary Figure 1. Non-specific T cell recruitment into the lungs following IM, IN or**  
 57 **AE immunization**

58 BAL fluid was collected pre-vaccination (baseline) and at weeks 6 (post-prime), 34 (post-boost)  
 59 and 48 (time of challenge, TOC) as well as on days 2, 4, 7 and 15 post-challenge. Absolute number  
 60 of total CD4<sup>+</sup> and CD8<sup>+</sup> T cells (memory and naïve) determined by flow cytometry. Circles, boxes  
 61 and horizontal lines represent individual animals, interquartile range and median, respectively,  
 62 while minima and maxima are denoted at whisker termini. # indicates that while sample collection  
 63 for AE prime cohort (orange) occurred on week 34, week 34 was two weeks following the single  
 64 AE prime rather than two weeks following a boost as in all other groups. Immunizations include  
 65 control mRNA (ctrl mRNA) via IM route, control adenovirus vector (ctrl Ad) via AE route,  
 66 mRNA-1273 via IM route, mRNA-1273.222 via IM route, and bivalent ChAd-SARS-CoV-2-S via  
 67 AE or IN route. Number of NHP per group (*n*) are as follows: control = 8; IM boost = 8; IN boost  
 68 = 6; AE boost = 6; AE prime = 4.
